# Supplementary material for: Porous calcium–manganese oxide/carbon nanotube microspheres as efficient oxygen reduction catalysts for rechargeable zinc–air batteries
Source: Royal Society of Chemistry journal article supplement (doi:10.1039/d0qi01459a), 2021-01-01
Supplement: d0qi01459a1.pdf [file d0qi01459a1.pdf]

## Supplementary information

### Porous calcium-manganese oxide/carbon nanotube microspheres as efficient oxygen reduction catalysts for rechargeable zinc air batteries

Nguk Neng Tham<sup>1</sup>, Xiaoming Ge<sup>1</sup>, Aishui Yu<sup>2</sup>, Bing Li<sup>1,3</sup>, Yun Zong<sup>1\*</sup>, Zhaolin Liu<sup>1\*</sup>

<sup>1</sup>Institute of Materials Research and Engineering (IMRE), A\*STAR (Agency for Science, Technology and Research), 2 Fusionopolis Way, Innovis, #08-03, Singapore 138634, Republic of Singapore. Email: zl-liu@imre.a-star.edu.sg

<sup>2</sup>Department of Chemistry, Shanghai Key Laboratory of Molecular Catalysis and Innovative Materials, Institute of New Energy, Fudan University, Shanghai 200438, China

<sup>3</sup>School of Chemistry and Chemical Engineering, Harbin Institute of Technology, Harbin 150001, China

### Contents

|                                                                                                                            |    |
|----------------------------------------------------------------------------------------------------------------------------|----|
| 1. Fig. S1 SEM image of the carbonate precursor, $\text{CaMn}(\text{CO}_3)_2$ .....                                        | S2 |
| 2. Fig. S2 XRD pattern of $\text{CaMn}(\text{CO}_3)_2$ and its standard, PDF #84-1290 .....                                | S3 |
| 3. Fig. S3 TEM and HRTEM images of $\text{CaMnO}_3$ .....                                                                  | S4 |
| 4. Fig. S4 TGA profile of $\text{CaMnO}_3$ , CMO/CNT and carbon nanotubes in air .....                                     | S5 |
| 5. Fig. S5 Nyquist plot of zinc-air batteries with CMO/CNT-4, CMO/CNT-0.25 and Pt/C .....                                  | S6 |
| 6. Fig. S6 Cycling stability performance of CMO/CNT-0.25 during galvanostatic recurrent pulse cycling test .....           | S7 |
| 7. Table S1 Tabulated data for oxygen reduction reaction of the various electrocatalysts, with Pt/C as the benchmark ..... | S8 |

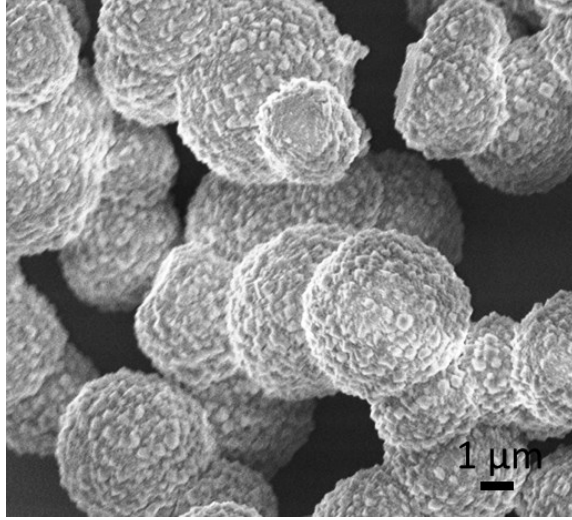

Fig. S1 SEM image of the carbonate precursor, CaMn(CO<sub>3</sub>)<sub>2</sub>.

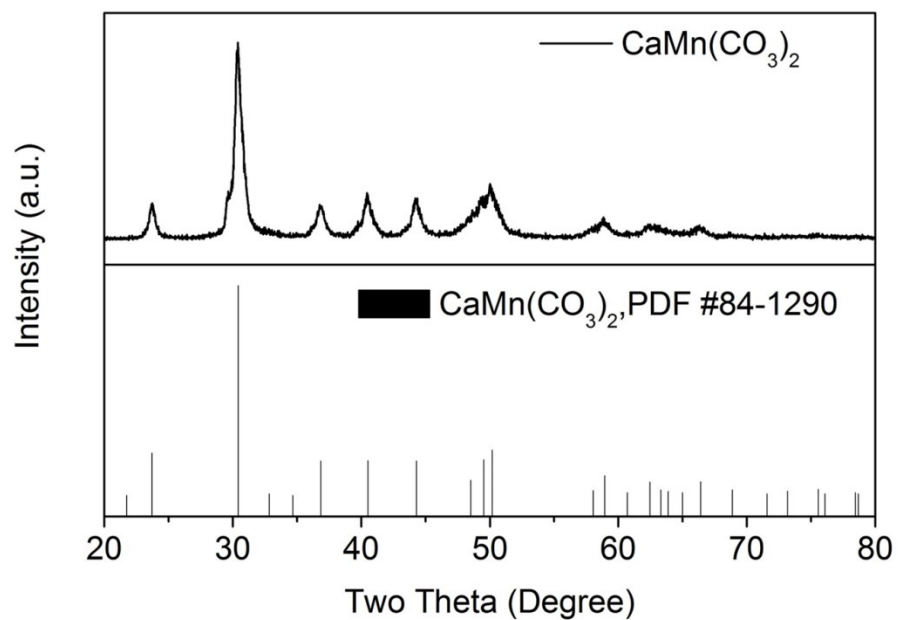

Fig. S2 XRD pattern of  $\text{CaMn}(\text{CO}_3)_2$  and its standard, PDF #84-1290

The presence of  $\text{CaMn}(\text{CO}_3)_2$  is further confirmed by XRD which corresponds to the standard (PDF #84-1290).

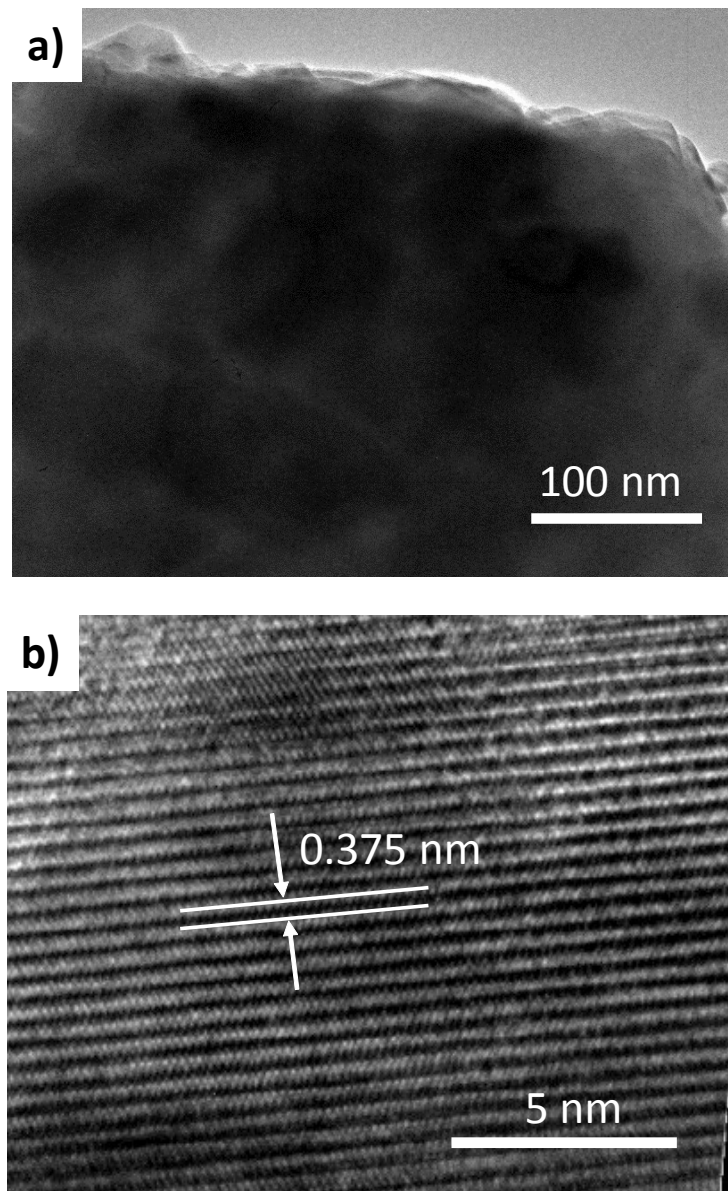

Fig. S3 TEM (a) and high-resolution TEM (b) images of  $\text{CaMnO}_3$ .

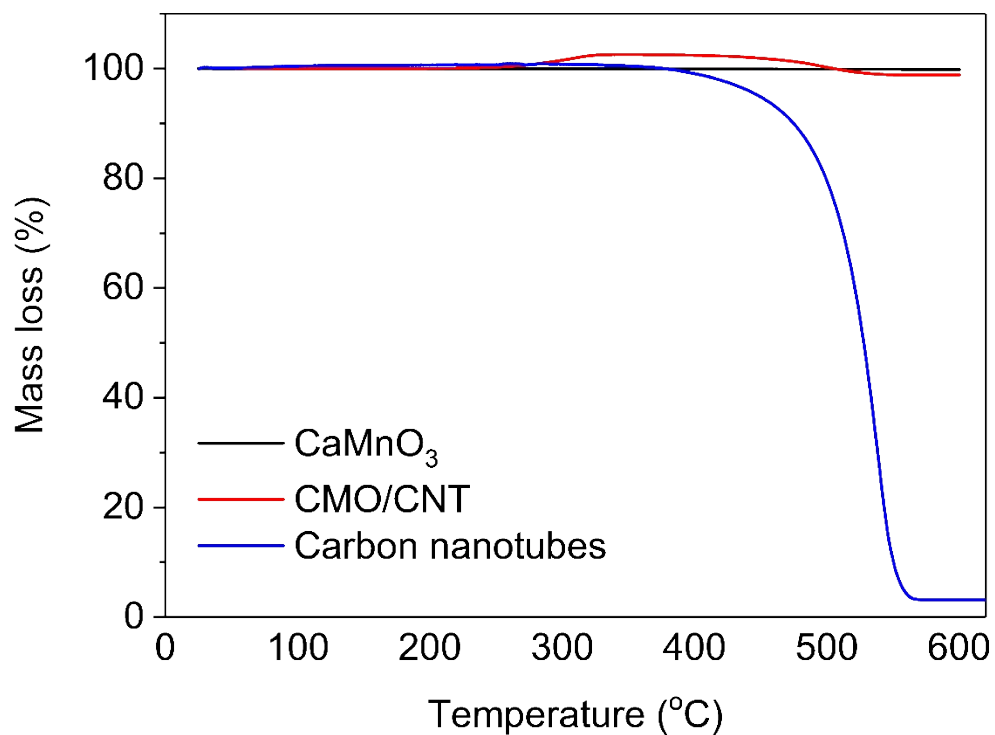

Fig. S4 TGA profile of CaMnO<sub>3</sub>, CMO/CNT and carbon nanotubes in air. CMO/CNT (red) shows re-oxidation to stoichiometric CaMnO<sub>3</sub> (black), where no mass gain is observed in CaMnO<sub>3</sub>. Pure carbon nanotubes (blue) burn off occurs above 350 °C and corresponds to the weight loss of carbon nanotubes in CMO/CNT.

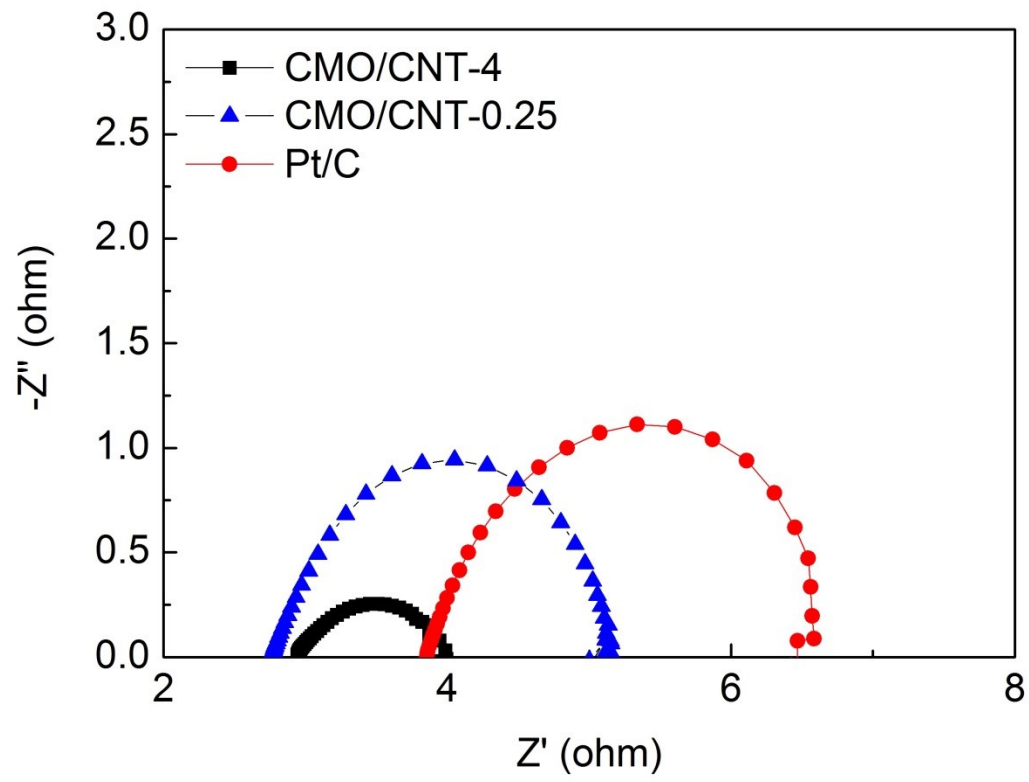

Fig. S5 Nyquist plot of zinc-air batteries with CMO/CNT-4, CMO/CNT-0.25 and Pt/C.

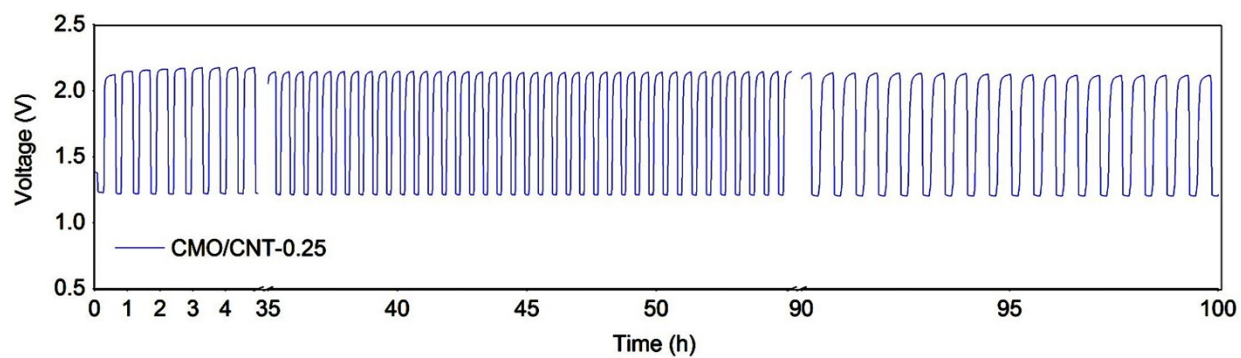

Fig. S6 Cycling stability performance of CMO/CNT-0.25 during galvanostatic recurrent pulse cycling test (discharging at  $5 \text{ mA cm}^{-2}$  for 10 min and charging at  $2.5 \text{ mA cm}^{-2}$  for 20 min in each cycle).

Table S1. Chemical states of Mn and O in  $\text{CaMnO}_{3-\delta}$  and CMO/CNT.

|                           | Mn $2p_{3/2}$    |                  |                          | O 1s           |                 |                        |
|---------------------------|------------------|------------------|--------------------------|----------------|-----------------|------------------------|
|                           | Mn <sup>3+</sup> | Mn <sup>4+</sup> | Mn <sup>3+</sup> content | lattice oxygen | adsorbed oxygen | lattice oxygen content |
|                           | (eV)             | (eV)             | (%)                      | (eV)           | (eV)            | (%)                    |
| $\text{CaMnO}_{3-\delta}$ | 642.0            | 642.8            | 34.8                     | 529.0          | 532.1           | 42.2                   |
| CMO/CNT                   | 641.7            | 642.5            | 33.6                     | 529.4          | 531.0           | 41.3                   |



Table S2 Tabulated data for oxygen reduction reaction of the various electrocatalysts, with Pt/C as the benchmark

| Catalyst           | Oxygen reduction reaction activity     |                                                          |
|--------------------|----------------------------------------|----------------------------------------------------------|
|                    | Onset potential at tangent (V, vs RHE) | Current density at 0.2 V (vs RHE) (mA cm <sup>-2</sup> ) |
| CaMnO <sub>3</sub> | 0.76                                   | -2.47                                                    |
| CMO/CNT            | 0.84                                   | -4.27                                                    |
| Carbon nanotubes   | 0.72                                   | -2.83                                                    |
| 20 % Pt/C          | 0.89                                   | -5.34                                                    |
